# Supplementary material for: Direct carbonization of black liquor powders into 3D honeycomb-like porous carbons with a tunable disordered degree for sodium-ion batteries
Source: Royal Society of Chemistry journal article supplement (doi:10.1039/d0nj01228a), 2020-01-01
Supplement: d0nj01228a1.pdf [file d0nj01228a1.pdf]

# Supplementary Information

## **Direct Carbonization of Black Liquor Powders into 3D Honeycomb-Like Porous Carbons with Tunable Disordered Degree for Sodium-Ion Battery**

Jianguo Huang,<sup>1,2</sup> Weicai Zhang,<sup>1,2</sup> Peifeng Yu,<sup>1,2</sup> Hanwu Dong,<sup>1,2</sup> Mingtao Zheng,<sup>1,2</sup>  
Yong Xiao,<sup>1,2</sup> Hang Hu,<sup>1,2</sup> Yingliang Liu,<sup>\*1,2</sup> Yeru Liang<sup>\*1,2</sup>

*1. Key Laboratory for Biobased Materials and Energy of Ministry of Education/Guangdong Provincial Engineering Technology Research Center for Optical Agriculture, College of Materials and Energy, South China Agricultural University, Guangzhou, 510642, China.*

*2. Guangdong Laboratory of Lingnan Modern Agriculture, Guangzhou, 510642, China.*

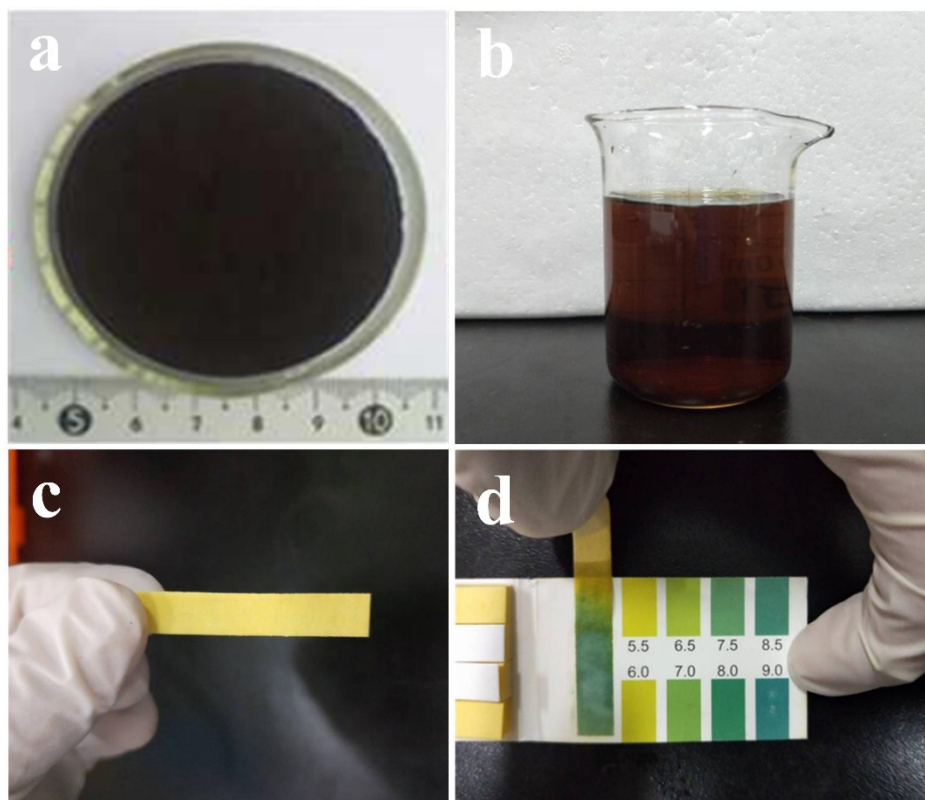

**Fig. S1** Photographs of (a) the black liquid powder, (b) the black liquid aqueous solution, pH test paper without (c) and with (d) the addition of black liquid.

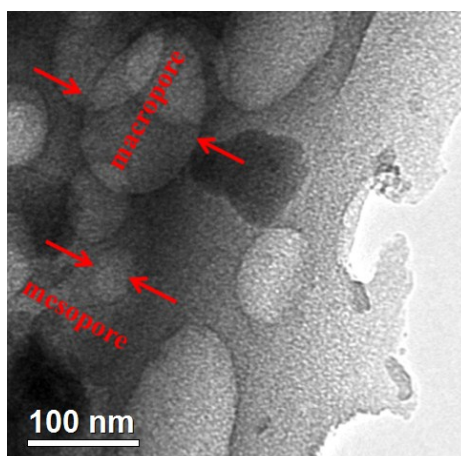

**Fig. S2** TEM image of the BL-PC-1.

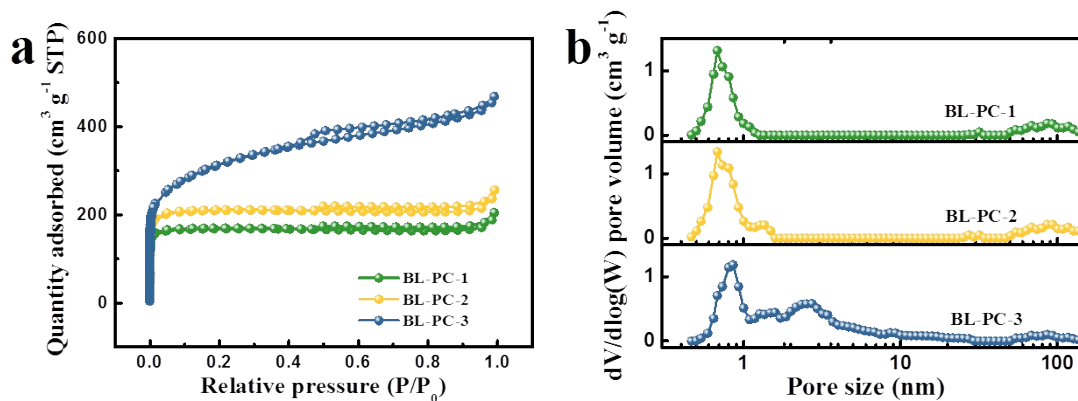

**Fig. S3** (a) N<sub>2</sub> adsorption–desorption isotherms and (b) DFT pore size distribution curves of the typical samples.

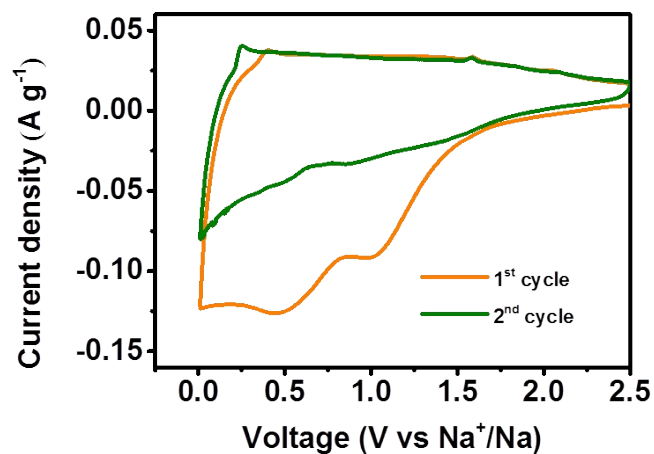

**Fig. S4** CV curves of BL-PC-1 for the first two cycles for at a scan rate of 0.1 mV s<sup>-1</sup>.

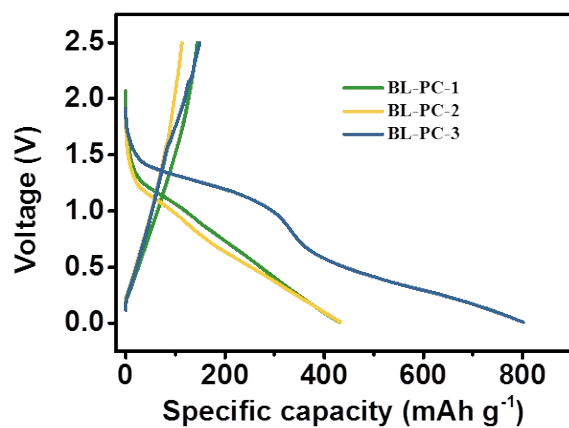

**Fig. S5** Galvanostatic charge–discharge curves for the first discharge/charge profile of BL-PC-1, BL-PC-2 and BL-PC-3 at a current density of 100 mA g<sup>-1</sup>.

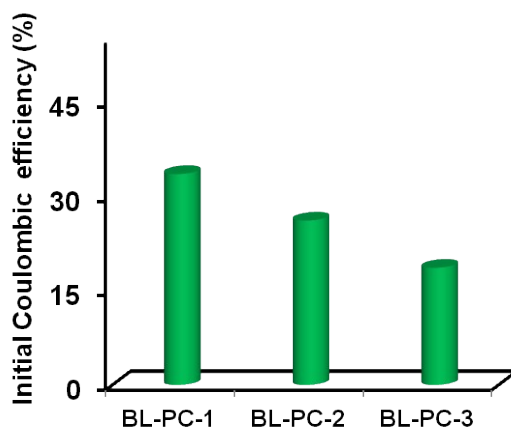

**Fig. S6** The initial Coulombic efficiency for the BL-PCs.

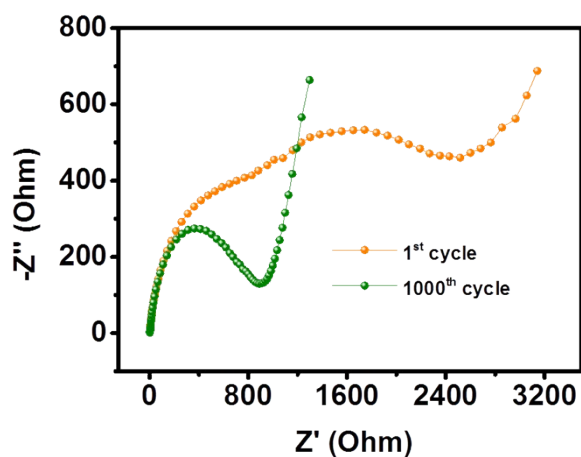

**Fig. S7** Electrochemical impedance spectra of the BL-PC-1.

**Table S1** Summary of BET specific surface area and total pore volume of the samples.

| Samples | $S_{\text{BET}}$ ( $\text{m}^2 \text{g}^{-1}$ ) | $V_t$ ( $\text{cm}^3 \text{g}^{-1}$ ) |
|---------|-------------------------------------------------|---------------------------------------|
| BL-PC-1 | 683                                             | 0.27                                  |
| BL-PC-2 | 829                                             | 0.33                                  |
| BL-PC-3 | 1146                                            | 0.72                                  |

**Table S2** Electrochemical performance comparison of various anodes materials for sodium-ion batteries

| Samples                                   | Capacity (mAh g <sup>-1</sup> )<br>at high current<br>density | Range of current<br>density (mA g <sup>-1</sup> ) | Capacity<br>retention (%) | Refer.<br>number |
|-------------------------------------------|---------------------------------------------------------------|---------------------------------------------------|---------------------------|------------------|
| <b>BL-PC-1</b>                            | <b>83 (1000 mA g<sup>-1</sup>)</b>                            | <b>100-1000</b>                                   | <b>60</b>                 | <b>This work</b> |
| Hard carbon                               | 50 (1000 mA g <sup>-1</sup> )                                 | 50-1000                                           | 22                        | [1]              |
| Porous hard carbons                       | 75 (500 mA g <sup>-1</sup> )                                  | 40-500                                            | 28                        | [2]              |
| Sugar-derived carbons                     | 62 (1000 mA g <sup>-1</sup> )                                 | 100-1000                                          | 28                        | [3]              |
| Reed straw derived hard carbon            | 46 (1000 mA g <sup>-1</sup> )                                 | 100-1000                                          | 22                        | [4]              |
| Water caltrop shell-derived hard carbons  | 51 (1000 mA g <sup>-1</sup> )                                 | 100-1000                                          | 18                        | [5]              |
| Hierarchically porous carbon monoliths    | 63 (1000 mA g <sup>-1</sup> )                                 | 100-1000                                          | 58                        | [6]              |
| Mesocarbon microbeads                     | 30 (800 mA g <sup>-1</sup> )                                  | 100-800                                           | 13                        | [7]              |
| Hierarchical porous carbons               | 105 (1000 mA g <sup>-1</sup> )                                | 100-1000                                          | 60                        | [8]              |
| Reduced graphene oxide                    | 96 (1000 mA g <sup>-1</sup> )                                 | 80-1000                                           | 54                        | [9]              |
| Hollow carbon sphere                      | 120 (1000 mA g <sup>-1</sup> )                                | 200-1000                                          | 54                        | [10]             |
| Hollow carbon nanowires                   | 149 (500 mA g <sup>-1</sup> )                                 | 50-500                                            | 59                        | [11]             |
| Carbon nanoparticle                       | 78 (1000 mA g <sup>-1</sup> )                                 | 100-1000                                          | 28                        | [12]             |
| Surface-carboxylated carbon nanoparticles | 82 (1000 mA g <sup>-1</sup> )                                 | 100-1000                                          | 30                        | [12]             |
| Carbon nanotubes                          | 36 (1000 mA g <sup>-1</sup> )                                 | 100-1000                                          | 52                        | [13]             |
| Carbon nanosheets                         | 80 (1000 mA g <sup>-1</sup> )                                 | 100-1000                                          | 23                        | [14]             |
| Microporous spherical carbon              | 67 (1000 mA g <sup>-1</sup> )                                 | 100-1000                                          | 51                        | [15]             |
| Carbon nanofibers                         | 75 (1000 mA g <sup>-1</sup> )                                 | 100-1000                                          | 34                        | [16]             |
| Crumpled graphene paper                   | 100 (1000 mA g <sup>-1</sup> )                                | 100-1000                                          | 59                        | [17]             |
| Hard carbon nanoparticles                 | 72 (1250 mA g <sup>-1</sup> )                                 | 125-1250                                          | 31                        | [18]             |

|                                                       |                                |          |     |      |
|-------------------------------------------------------|--------------------------------|----------|-----|------|
| Lignin-derived carbon                                 | 75 (1000 mA g <sup>-1</sup> )  | 100-1000 | 50  | [3]  |
| Oak sawdust-derived                                   | 3.5 (1000 mA g <sup>-1</sup> ) | 100-1000 | 1.9 | [3]  |
| Densified graphene                                    | 91 (1000 mA g <sup>-1</sup> )  | 100-1000 | 72  | [19] |
| Hard carbon derived from cucumber stem                | 73 (1000 mA g <sup>-1</sup> )  | 100-1000 | 31  | [20] |
| Hard carbon                                           | 52 (1000 mA g <sup>-1</sup> )  | 100-1000 | 32  | [21] |
| Kraft lignin/ cellulose acetate derived carbon powder | 50 (500 mA g <sup>-1</sup> )   | 50-500   | 29  | [22] |
| Kraft lignin derived carbon powder                    | 42 (500 mA g <sup>-1</sup> )   | 50-500   | 23  | [22] |
| Cellulose acetate nanofibers                          | 19 (500 mA g <sup>-1</sup> )   | 50-500   | 32  | [22] |
| Hard carbon microspherules                            | 78 (600 mA g <sup>-1</sup> )   | 60-600   | 30  | [23] |
| Metal organic framework-derived carbons               | 85 (200 mA g <sup>-1</sup> )   | 50-200   | 53  | [24] |
| Mesoporous disordered carbon                          | 115 (1000 mA g <sup>-1</sup> ) | 100-1000 | 40  | [25] |
| Mesoporous soft carbon                                | 105 (1000 mA g <sup>-1</sup> ) | 100-1000 | 47  | [26] |
| Porous Carbon/Sn composite                            | 80 (1000 mA g <sup>-1</sup> )  | 100-1000 | 32  | [27] |
| Sn/micron-sized disordered carbon                     | 90 (610 mA g <sup>-1</sup> )   | 12-610   | 50  | [28] |
| Sn thin film on conductive wood fiber                 | 50 (170 mA g <sup>-1</sup> )   | 84-170   | 38  | [29] |
| Trisodium 1,2,4-benzenetricarboxylate                 | 53 (400 mA g <sup>-1</sup> )   | 50-400   | 28  | [30] |
| paracyclophane-1,9,17,25-tetraene                     | 70 (1000 mA g <sup>-1</sup> )  | 100-1000 | 47  | [31] |
| Sodium Naphthalene Dicarboxylate                      | 85 (500 mA g <sup>-1</sup> )   | 31-500   | 40  | [32] |

## References:

- [1]. Xiao, B., et al., Lithium-Pretreated Hard Carbon as High-Performance Sodium-Ion Battery Anodes. *Advanced Energy Materials*, 2018. 8(24): p. 1801441.
- [2]. Zhang, N., et al., High capacity hard carbon derived from lotus stem as anode for sodium ion batteries. *Journal of Power Sources*, 2018. 378: p. 331-337.
- [3]. Yoon, D., et al., Carbon with Expanded and Well-Developed Graphene Planes Derived Directly from Condensed Lignin as a High-Performance Anode for Sodium-Ion Batteries. *ACS Applied Materials & Interfaces*, 2017. 10(1): p. 569-581.
- [4]. Wang, J., et al., Facile hydrothermal treatment route of reed straw-derived hard carbon for high performance sodium ion battery. *Electrochimica Acta*, 2018. 291: p. 188-196.
- [5]. Wang, P., et al., Low-cost water caltrop shell-derived hard carbons with high initial coulombic efficiency for sodium-ion battery anodes. *Journal of Alloys and Compounds*, 2019. 775: p. 1028-1035.
- [6]. Gong, J., et al., A Novel Method of Fabricating Free-Standing and Nitrogen-Doped 3D Hierarchically Porous Carbon Monoliths as Anodes for High-Performance Sodium-Ion Batteries by Supercritical CO<sub>2</sub> Foaming. *ACS Applied Materials & Interfaces*, 2019.
- [7]. Song, L., et al., Anode performance of mesocarbon microbeads for sodium-ion batteries. *Carbon*, 2015. 95: p. 972-977.
- [8]. Wang, H., et al., Biomass derived hierarchical porous carbons as high-performance anodes for sodium-ion batteries. *Electrochimica Acta*, 2016. 188: p. 103-110.
- [9]. Wang, Y., et al., Reduced graphene oxide with superior cycling stability and rate capability for sodium storage. *Carbon*, 2013. 57: p. 202-208.
- [10]. Tang, K., et al., Hollow Carbon Nanospheres with Superior Rate Capability for Sodium-Based Batteries. *Advanced Energy Materials*, 2012. 2(7): p. 873-877.
- [11]. Cao, Y., et al., Sodium Ion Insertion in Hollow Carbon Nanowires for Battery Applications. *Nano Letters*, 2012. 12(7): p. 3783-3787.
- [12]. Gaddam, R.R., et al., Biomass derived carbon nanoparticle as anodes for high performance sodium and lithium ion batteries. *Nano Energy*, 2016. 26: p. 346-352.
- [13]. Luo, X., et al., Graphene nanosheets, carbon nanotubes, graphite, and activated carbon as anode materials for sodium-ion batteries. *Journal of Materials Chemistry A*, 2015. 3(19): p. 10320-10326.
- [14]. Wang, H., et al., Nitrogen-Doped Porous Carbon Nanosheets as Low-Cost, High-Performance Anode Material for Sodium-Ion Batteries. *ChemSusChem*, 2013. 6(1): p. 56-60.
- [15]. Zhou, D., et al., Long cycle life microporous spherical carbon anodes for sodium-ion batteries derived from furfuryl alcohol. *JOURNAL OF MATERIALS CHEMISTRY A*, 2016. 4(17): p. 6271-6275.
- [16]. Zhao, P., et al., Electrochemical performance of fulvic acid-based electrospun hard carbon nanofibers as promising anodes for sodium-ion batteries. *Journal of Power Sources*, 2016. 334: p. 170-178.
- [17]. Yun, Y.S., et al., Crumpled graphene paper for high power sodium battery anode. *Carbon*, 2016. 99: p. 658-664.
- [18]. Xiao, L., et al., Hard carbon nanoparticles as high-capacity, high-stability anodic materials for Na-ion batteries. *Nano Energy*, 2016. 19: p. 279-288.
- [19]. Zhang, J., et al., The Interplay of Oxygen Functional Groups and Folded Texture in Densified Graphene Electrodes for Compact Sodium-Ion Capacitors. *Advanced Energy Materials*, 2018. 8(11): p. 1702395.
- [20]. Li, C., et al., Heteroatom-doped hierarchically porous carbons derived from cucumber stem as high-performance anodes for sodium-ion batteries. *Journal of Materials Science*, 2019. 54(7): p. 5641-5657.
- [21]. Liu, X., et al., High Capacity and Cycle-Stable Hard Carbon Anode for Nonflammable Sodium-Ion Batteries. *ACS Applied Materials & Interfaces*, 2018. 10(44): p. 38141-38150.
- [22]. Jia, H., et al., Electrospun Kraft Lignin/Cellulose Acetate-Derived Nanocarbon Network as an Anode for High-Performance Sodium-Ion Batteries. *ACS Applied Materials & Interfaces*, 2018. 10(51): p. 44368-44375.
- [23]. Li, Y., et al., Amorphous monodispersed hard carbon micro-spherules derived from biomass as a high performance negative electrode material for sodium-ion batteries. *Journal of Materials Chemistry A*, 2015. 3(1): p. 71-77.
- [24]. Ingersoll, N., et al., Metal organic framework-derived carbon structures for sodium-ion battery anodes. *Electrochimica Acta*, 2019. 297: p. 129-136.
- [25]. Raj K, A., et al., Bio-derived mesoporous disordered carbon: An excellent anode in sodium-ion



- battery and full-cell lab prototype. *Carbon*, 2019, 143: p. 402-412.
- [26]. Cao, B., et al., Mesoporous soft carbon as an anode material for sodium ion batteries with superior rate and cycling performance. *Journal of Materials Chemistry A*, 2016, 4(17): p. 6472-6478.
- [27]. Xu Y., et al., Electrochemical Performance of Porous Carbon/Tin Composite Anodes for Sodium-Ion and Lithium-Ion Batteries. *Adv Energy Mater*, 2013: p. 128-133.
- [28]. Bresser D., et al., Embedding tin nanoparticles in micron-sized disordered carbon for lithium- and sodium-ion anodes. *Electrochim Acta*, 2014, 128: p. 163-71.
- [29]. Zhu H., et al., Tin Anode for Sodium-Ion Batteries Using Natural Wood Fiber as a Mechanical Buffer and Electrolyte Reservoir. *Nano Lett* 2013, 13: p. 3093-3100.
- [30]. Luo C, Shea JJ, Huang J. A carboxylate group-based organic anode for sustainable and stable sodium ion batteries. *J Power Sources* 2020, 453: p. 227904.
- [31]. Eder S., et al. Switching between local and global aromaticity in a conjugated macrocycle enables high-performance organic sodium-ion battery anodes. *Angewandte Chemie International Edition*, 2020. Doi.org/10.1002/anie.202003386.
- [32]. Medabalmi V., et al., Sodium Naphthalene Dicarboxylate Anode Material for Inorganic-Organic Hybrid Rechargeable Sodium-Ion Batteries. *J Electrochem Soc*, 2018, 165: p. A175-A180.
